# Supplementary material for: Analogy, Cognitive Architecture and Universal Construction: A Tale of Two Systematicities
Source: PubMed Central journal article supplement (PMC3934878; doi:10.1371/journal.pone.0089152), 2014-02-25
Supplement: pone.0089152.s002.pdf [file pone.0089152.s002.pdf]

## Text S2

In this section, we define a (pointed) set of concept trees and a partial (approximation) ordering over them, and together they constitute a poset and hence a category. Moreover, a product in this category is a greatest lower bound on the approximation of two concept trees. This categorical approach provides the formal basis for deriving Gentner's systematicity from universal constructions.

**Definition ( $n$ -ary relational concept).** An  $n$ -ary relational concept is a concept that takes  $n$  concepts as related arguments. Constants or features are regarded as 0-ary (nullary) relational concepts. Predicates are regarded as 1-ary (unary) relational concepts. Binary relations are regarded as 2-ary, ternary relations as 3-ary, quaternary as 4-ary relational concepts, etc.  $\square$

**Example ( $n$ -ary relational concepts).** Nouns and values, e.g., *ball*, *red*, are typically 0-ary relational concepts, as they do not take any concepts as relational arguments. Categories of features, e.g., *colour*, are usually 1-ary relational concepts, as they take a single argument as the related concept, e.g., *colour red*. *Loves* is a binary relational concept, e.g., *John loves Mary*. *Gives* is a ternary relational concept, e.g., *John gives Mary a book*.  $\square$

**Definition ( $N$ -ary relational concept trees).** Let  $A_n$  be a set of  $n$ -ary relational concepts, for  $0 \leq n \leq N$ . A relational concept tree is a pair consisting of a single  $n$ -ary relational concept ( $a \in A_n$ ) leaf and a sequence of  $n$  relational concept branch trees, denoted  $(t_1, \dots, t_n)$ , or in shorter index form,  $(t_i)_{i=1}^n$ . A relational concept tree is denoted  $\langle a, (t_1, \dots, t_n) \rangle$ , or  $\langle a, (t_i)_{i=1}^n \rangle$ . When  $n = 0$  (a constant concept tree), the sequence of branch trees is empty, denoted  $()$ , and in a slight abuse of notation, a constant concept tree  $\langle a, () \rangle$  is simply denoted  $\langle a \rangle$ . An  $N$ -ary relational concept tree is a relational concept tree with maximum relational concept arity  $N$  over all subtrees.  $\square$

**Example ( $N$ -ary relational concept trees).** An example of a 0-ary (constant) relational concept tree is  $\langle \text{John} \rangle$ . An example of a 1-ary relational concept tree is  $\langle \text{colour}, (\langle \text{red} \rangle) \rangle$ . An example of a 2-ary relational concept tree is  $\langle \text{loves}, (\langle \text{John} \rangle, \langle \text{Mary} \rangle) \rangle$ .

**Definition (Relational concept order).** The relational concept order of a concept in a concept tree is either: zero for 0-ary relational concepts; or one plus the maximum order of the concepts in its branch trees for  $i$ -ary concepts,  $1 \leq i$ . Concepts of order one are called *first-order*, and concepts of order greater than one are called *higher-order* relational concepts.  $\square$

**Example (Relational concept order).** *Loves* is a first-order concept in  $\langle \text{loves}, (\langle \text{John} \rangle, \langle \text{Mary} \rangle) \rangle$ . *Knows* is a higher(second)-order concept in the tree  $\langle \text{knows}, (\langle \text{Sue} \rangle, \langle \text{loves}, (\langle \text{John} \rangle, \langle \text{Mary} \rangle) \rangle) \rangle$ .  $\square$

**Definition (Pointed tree).** A *pointed tree* is an  $N$ -ary relational concept tree constructed from a set of relational concept trees that includes a designated point element  $\perp$ . The point is the “unknown” concept tree.  $\square$

**Example (Pointed tree).** An example is  $\langle \text{loves}, (\langle \text{John} \rangle, \perp) \rangle$ , which indicates that what is loved by John is not known.  $\square$

**Definition (Approximation ordering).** The *approximation ordering*  $\sqsubseteq$  is a binary relation on a set of  $N$ -ary relational (approximation) concept trees,  $T_\perp$ , that is defined for  $0 \leq n \leq N$  by:

$$\perp \sqsubseteq t \quad \text{and} \\ \langle a, (t_i)_{i=1}^n \rangle \sqsubseteq \langle b, (r_i)_{i=1}^n \rangle \Leftrightarrow (a = b) \wedge \left( \bigwedge_{i=1}^n t_i \sqsubseteq r_i \right)$$

$\square$

**Example (Tree orderings).** The following are examples of approximation orderings on pointed trees:  $\perp \sqsubseteq \perp$ ;  $\perp \sqsubseteq \langle \text{John} \rangle$ ; and  $\langle \text{loves}, (\langle \text{John} \rangle, \perp) \rangle \sqsubseteq \langle \text{loves}, (\langle \text{John} \rangle, \langle \text{Mary} \rangle) \rangle$ . Examples of pairs of trees that are not ordered are:  $\langle \text{John} \rangle$  and  $\langle \text{Mary} \rangle$ ; and  $\langle \text{loves}, (\langle \text{John} \rangle, \perp) \rangle$  and  $\langle \text{loves}, (\perp, \langle \text{Mary} \rangle) \rangle$ .  $\square$

**Remark (Least).**  $\perp$  is the *least* element of  $T_\perp$ , i.e.  $\perp \sqsubseteq t$  for all  $t \in T_\perp$ .  $\square$

**Proposition (Approximation partial order).** The approximation ordering  $\sqsubseteq$  is a partial order.

*Proof.* We are required to prove that  $\sqsubseteq$  is: *reflexive*,  $t \sqsubseteq t$ ; *transitive*,  $s \sqsubseteq t \wedge t \sqsubseteq r \Rightarrow s \sqsubseteq r$ ; and *antisymmetric*,  $t \sqsubseteq r \wedge r \sqsubseteq t \Rightarrow t = r$  for all  $s, t, r \in T_\perp$ . The proof is by *structural induction*. Structural induction proceeds analogously to mathematical induction. First, we prove that the target proposition holds for the base case. Next, we prove that if the target proposition holds for trees  $(t_i)_{i=1}^n$ , then it holds for  $\langle a, (t_i)_{i=1}^n \rangle$ .

*Reflexive:*

Base ( $t = \perp$ ): Immediate, since  $\perp \sqsubseteq \perp$  (from the definition).

Hypothesis ( $(t_i)_{i=1}^n$ ): For each  $i$ , we assume  $t_i \sqsubseteq t_i$ .

Induction ( $\langle a, (t_i)_{i=1}^n \rangle$ ): Immediate (from the definition), since  $a = a$  and  $t_i \sqsubseteq t_i$  (by hypothesis) implies  $\langle a, (t_i)_{i=1}^n \rangle \sqsubseteq \langle a, (t_i)_{i=1}^n \rangle$ .

*Transitive:*

Base ( $s, t, r = \perp$ ):

$$\begin{aligned}
 s \sqsubseteq t \wedge t \sqsubseteq r & \quad (\text{definition}) \\
 \Rightarrow \perp \sqsubseteq \perp & \quad (\text{substitution}) \\
 \Rightarrow s \sqsubseteq r &
 \end{aligned}$$

Hypothesis ( $(s_i)_{i=1}^n, (t_i)_{i=1}^n, (r_i)_{i=1}^n$ ): For each  $i$ , we assume the following holds:  $s_i \sqsubseteq t_i \wedge t_i \sqsubseteq r_i \Rightarrow s_i \sqsubseteq r_i$ .

Induction ( $\langle a, (s_i)_{i=1}^n \rangle, \langle b, (t_i)_{i=1}^n \rangle, \langle c, (r_i)_{i=1}^n \rangle$ ):

$$\begin{aligned}
 \langle a, (s_i)_{i=1}^n \rangle \sqsubseteq \langle b, (t_i)_{i=1}^n \rangle \wedge \langle a, (s_i)_{i=1}^n \rangle \sqsubseteq \langle c, (r_i)_{i=1}^n \rangle & \quad (\text{definition}) \\
 \Rightarrow (a = b) \wedge (s_i \sqsubseteq t_i)_{i=1}^n \wedge (b = c) \wedge (t_i \sqsubseteq r_i)_{i=1}^n & \quad (=, \text{hypothesis}) \\
 \Rightarrow (a = c) \wedge (s_i \sqsubseteq r_i)_{i=1}^n & \quad (\text{definition}) \\
 \Rightarrow \langle a, (s_i)_{i=1}^n \rangle \sqsubseteq \langle c, (r_i)_{i=1}^n \rangle &
 \end{aligned}$$

*Antisymmetric:*

Base ( $t, r = \perp$ ): Immediate.

Hypothesis ( $(t_i)_{i=1}^n, (r_i)_{i=1}^n$ ): For each  $i$ , we assume the following proposition holds:  $t_i \sqsubseteq r_i \wedge r_i \sqsubseteq t_i \Rightarrow t_i = r_i$ .

Induction ( $\langle a, (t_i)_{i=1}^n \rangle, \langle b, (r_i)_{i=1}^n \rangle$ ):

$$\begin{aligned}
 \langle a, (t_i)_{i=1}^n \rangle \sqsubseteq \langle b, (r_i)_{i=1}^n \rangle \wedge \langle b, (r_i)_{i=1}^n \rangle \sqsubseteq \langle a, (t_i)_{i=1}^n \rangle & \quad (\text{definition}) \\
 \Rightarrow (a = b) \wedge (t_i \sqsubseteq r_i)_{i=1}^n \wedge (r_i \sqsubseteq t_i)_{i=1}^n & \quad (\text{hypothesis}) \\
 \Rightarrow (a = b) \wedge (t_i = r_i)_{i=1}^n & \quad (\text{equality}) \\
 \Rightarrow \langle a, (t_i)_{i=1}^n \rangle = \langle b, (r_i)_{i=1}^n \rangle &
 \end{aligned}$$

□

**Proposition (Tree category).** A pointed set of  $N$ -ary relational concept trees ( $T_\perp$ ) together with an approximation ordering ( $\sqsubseteq$ ) is a category.

*Proof.* Immediate from the fact that  $(T_\perp, \sqsubseteq)$  is a poset. □

**Definition (gca).** The function (binary operator)  $gca : T_\perp \times T_\perp \rightarrow T_\perp$ , which produces the *greatest*

common approximation of  $N$ -ary relational concept trees, is defined for all  $t, r \in T_{\perp}$  and  $0 \leq m, n \leq N$  by:

$$\begin{aligned}
 gca(t, \perp) &= \perp \\
 gca(\perp, r) &= \perp \\
 gca(\langle a, (t_i)_{i=1}^m \rangle, \langle b, (r_j)_{j=1}^n \rangle) &= \perp & a \neq b \\
 gca(\langle a, (t_i)_{i=1}^n \rangle, \langle a, (r_i)_{i=1}^n \rangle) &= \langle a, (gca(t_i, r_i))_{i=1}^n \rangle
 \end{aligned}$$

□

**Example (gca).** The gca of  $\langle \text{loves}, (\langle \text{John} \rangle, \perp) \rangle$  and  $\langle \text{loves}, (\perp, \langle \text{Mary} \rangle) \rangle$  is  $\langle \text{loves}, (\perp, \perp) \rangle$ . □

**Theorem (gca).** The greatest common approximation of trees  $t, r \in T_{\perp}$  is the greatest lower bound of  $t$  and  $r$ .

*Proof.* By structural induction: we need to show that for all  $z, t, r \in T_{\perp}$  when  $z \sqsubseteq t \wedge z \sqsubseteq r$  we have  $z \sqsubseteq gca(t, r)$ . In short, we need to prove the following target proposition:  $z \sqsubseteq t \wedge z \sqsubseteq r \Rightarrow z \sqsubseteq gca(t, r)$ .

Base ( $t = \perp$ ): The only case of  $z$  for which  $z \sqsubseteq \perp \wedge z \sqsubseteq r$  is  $z = \perp$ , since  $\perp$  is the least element of  $T_{\perp}$ . Hence, we have:

$$\begin{aligned}
 z \sqsubseteq \perp \wedge z \sqsubseteq r &\Rightarrow z \sqsubseteq gca(t, r) && \text{(substitution)} \\
 &\Rightarrow \perp \sqsubseteq gca(t, r) && \text{(least element)} \\
 &\Rightarrow \text{True} && \text{(reduction)} \\
 &\text{True}
 \end{aligned}$$

Hypothesis ( $(t_i)_{i=1}^n$ ): For each  $i$ , we assume the following proposition holds:  $z_i \sqsubseteq t_i \wedge z_i \sqsubseteq r_i \Rightarrow z_i \sqsubseteq gca(t_i, r_i)$ .

Induction ( $\langle a, (t_i)_{i=1}^n \rangle$ ): By definition (approximation), there are two cases of  $z$  for which  $z \sqsubseteq \langle a, (t_i)_{i=1}^n \rangle$ :

(1)  $z = \perp$  and (2)  $z = \langle a, (z_i)_{i=1}^n \rangle$ , where  $z_i \sqsubseteq t_i$ .

Case 1: This case has already been proven in the base case,  $t = \perp$ .

Case 2: Given that  $z = \langle a, (z_i)_{i=1}^n \rangle$ , the target proposition only requires us to consider the trees  $r$  where

$\langle a, (z_i)_{i=1}^n \rangle \sqsubseteq r$ . By definition (approximation), we only need to consider the trees  $r = \langle a, (r_i)_{i=1}^n \rangle$ , where  $z_i \sqsubseteq r_i$ . Hence, given  $z = \langle a, (z_i)_{i=1}^n \rangle$ ,  $r = \langle a, (r_i)_{i=1}^n \rangle$  and  $z_i \sqsubseteq r_i$ , we are required to prove:

$$\begin{aligned}
 z \sqsubseteq \langle a, (t_i)_{i=1}^n \rangle \wedge z \sqsubseteq r &\Rightarrow z \sqsubseteq gca(\langle a, (t_i)_{i=1}^n \rangle, r) \\
 &\text{(substitution)} \\
 &\Rightarrow \langle a, (z_i)_{i=1}^n \rangle \sqsubseteq gca(\langle a, (t_i)_{i=1}^n \rangle, \langle a, (r_i)_{i=1}^n \rangle) \\
 &\text{(definition of } gca) \\
 &\Rightarrow \langle a, (z_i)_{i=1}^n \rangle \sqsubseteq \langle a, (gca(t_i, r_i))_{i=1}^n \rangle \\
 &\text{(definition of } approximation) \\
 &\Rightarrow \bigwedge_{i=1}^n z_i \sqsubseteq gca(t_i, r_i) \\
 &\text{(hypothesis)} \\
 &\Rightarrow \text{True} \\
 &\text{(reduction)} \\
 &\text{True}
 \end{aligned}$$

□

**Theorem (Tree product, gca).** In the (pointed poset as a) category  $(T_{\perp}, \sqsubseteq)$ , a product of trees  $t, r \in T_{\perp}$  is the greatest common approximation tree of  $t$  and  $r$  together with the two approximation arrows,  $\sqsubseteq_t: t \times r \rightarrow t$  and  $\sqsubseteq_r: t \times r \rightarrow r$ , together denoted  $(t \times r, \sqsubseteq_t, \sqsubseteq_r)$ .

*Proof.* Immediate from the fact that the greatest common approximation tree is the greatest lower bound, a greatest lower bound is a product in a pointed poset as a category, and  $(T_{\perp}, \sqsubseteq)$ , as a pointed poset, is a category. □

**Remark (All products).** The category  $(T_{\perp}, \sqsubseteq)$  is said to have *all* binary products, since gca (hence, product) is defined for all pairs of trees in  $T_{\perp}$ . □
